# Supplementary material
Source: publisher figshare collection journal article supplement (https://acs.figshare.com/ndownloader/files/4780045)

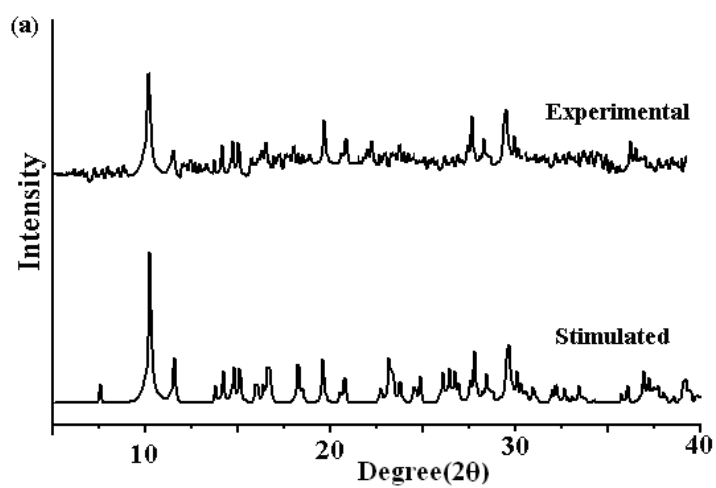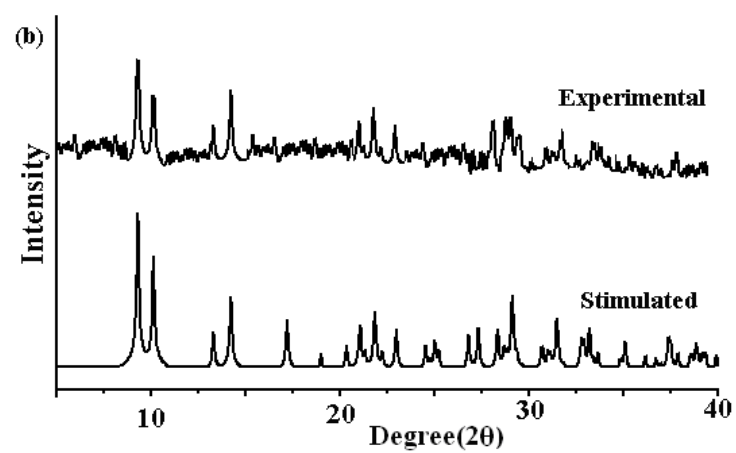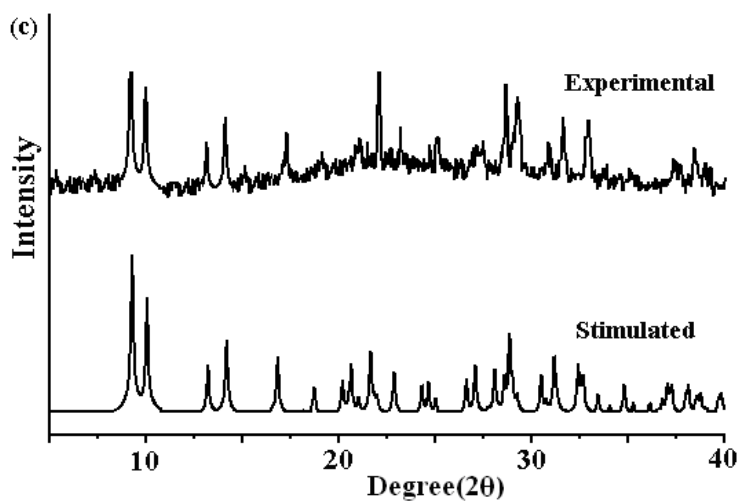

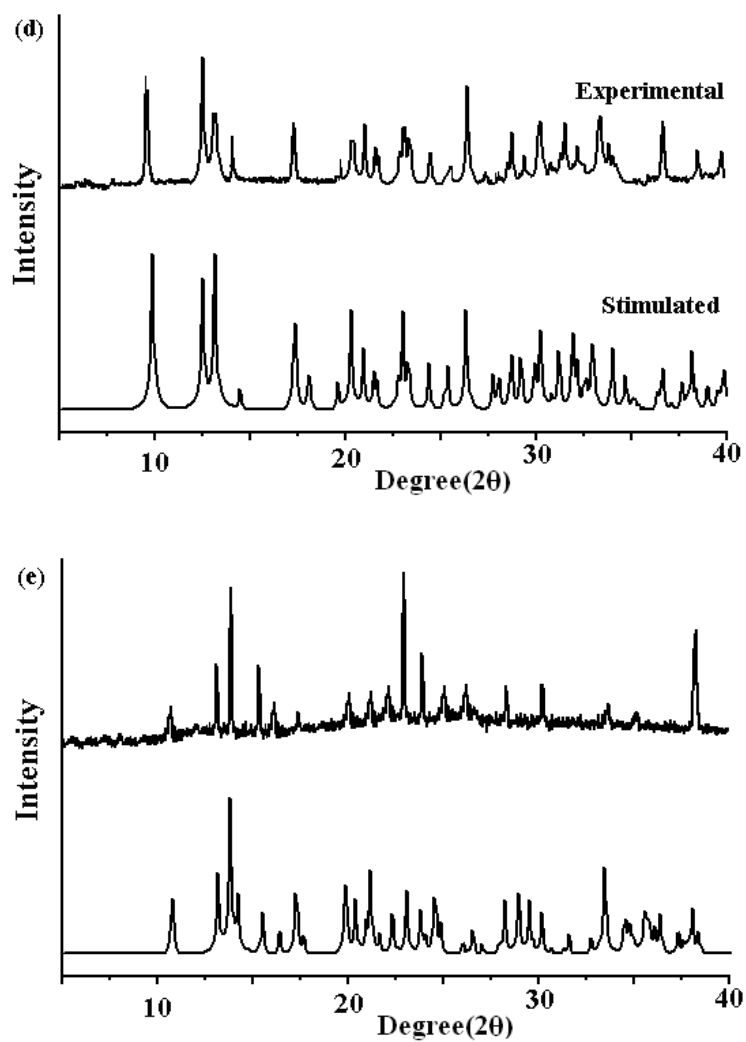

**Fig. S1** The XRD powder patterns of compound **1** (a), compound **2** (b), compound **3** (c), compound **4** (d), compound **5** (e)

Supplement: Supplementary file 1 [file 4780045]
